# Supplementary material for: A flexible, electrochromic, rechargeable Zn//PPy battery with a short circuit chromatic warning function
Source: Royal Society of Chemistry journal article supplement (doi:10.1039/c8ta03143f), 2018-01-01
Supplement: c8ta03143f1.pdf [file c8ta03143f1.pdf]

Electronic Supplementary Information

**A flexible, electrochromic, rechargeable Zn//PPy battery with short circuit  
chromatic warning function**

Jiaqi Wang,<sup>ab</sup> Jie Liu,<sup>ab</sup> Mengmeng Hu,<sup>ab</sup> Jie Zeng,<sup>a</sup> Yongbiao Mu,<sup>a</sup> Ya Guo,<sup>a</sup> Jie Yu,<sup>a</sup> Xing Ma,<sup>a</sup>  
Yejun Qiu,<sup>a</sup> Yan Huang,<sup>abc\*</sup>

<sup>a</sup>*Centre of Flexible and Printable Electronics, Harbin Institute of Technology (Shenzhen), Shenzhen 518055, China.*

<sup>b</sup>*School of Materials Science and Engineering, Harbin Institute of Technology (Shenzhen), Shenzhen 518055, China.*

<sup>c</sup>*State Key Laboratory of Advanced Welding and Joining, Harbin Institute of Technology (Shenzhen), Shenzhen 518055, China. e-mail: yanhuanglib@hit.edu.cn.*

## Figures

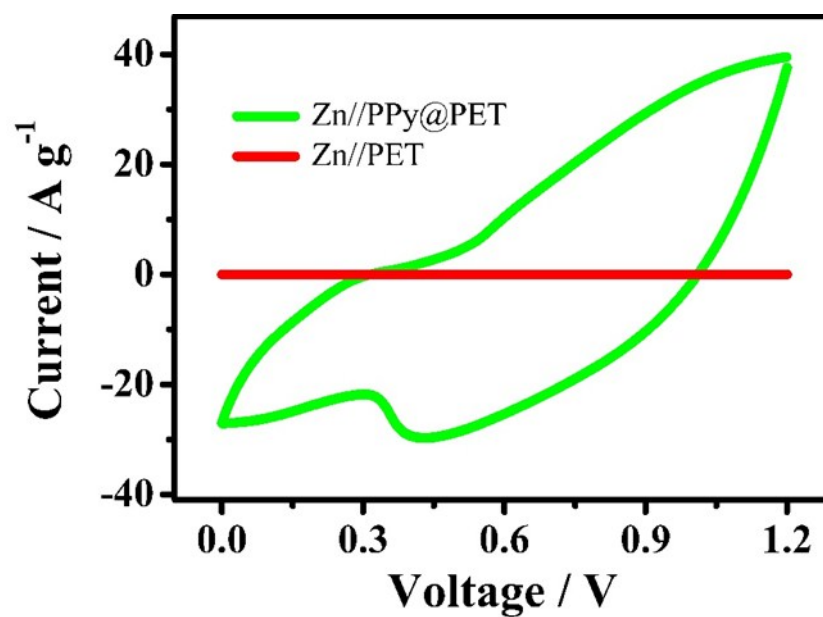

**Fig. S1.** The CV curves of the PET with and without deposited PPy at a scan rate of 100 mV s<sup>-1</sup>.

The CV curve of PET without deposited PPy is a straight line. The conductive PET has no contribution to the capacity of Zn//PPy battery.

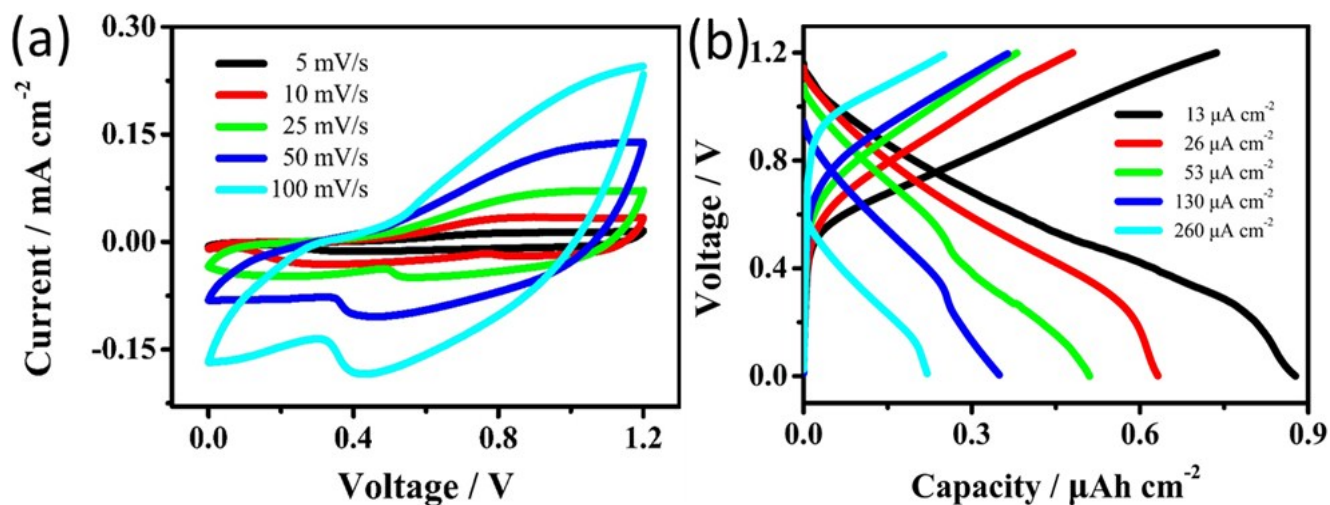

**Fig. S2. Electrochemical performances of the rechargeable and flexible Zn// PPy battery in terms of areal capacity.** (a) CV curves at various scan rates from 5 to 100 mV s<sup>-1</sup>. (b) GCD curves at various charging/discharging currents from 13 to 260 μA cm<sup>-2</sup>.

The two-dimensional battery delivers areal capacity of 0.9 μAh cm<sup>-2</sup> at the current density of 13 μA cm<sup>-2</sup>.

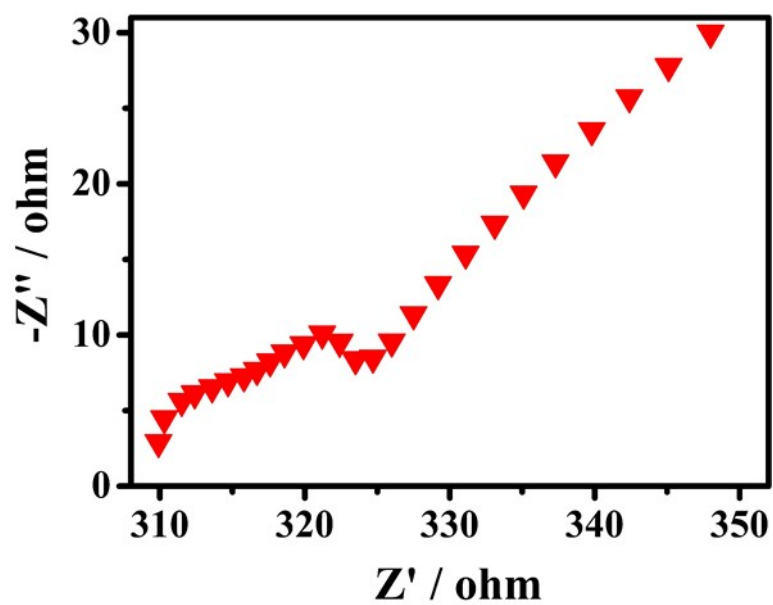

**Fig. S3.** The Nyquist plot of the flexible electrochromic Zn//PPy battery.

The battery has a systematic resistance about 310  $\Omega$ , and a small charge transfer resistance around 15  $\Omega$ .

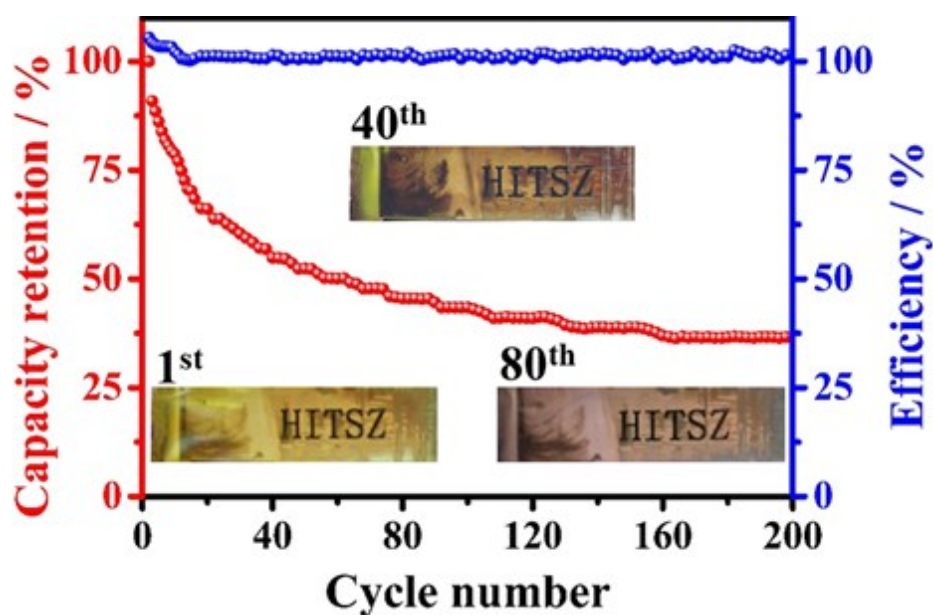

**Fig. S4.** Capacity retention as a function of cycle number at specific current of  $4.4 \text{ A g}^{-1}$  and the electrochromic effect in different cycle number at a voltage of 0 V.

The battery retains 41% and 38% of initial capacity after 100 and 200 cycles, respectively. The columbic efficiency of the battery almost retains 100%, demonstrating good performance. Besides, the battery is bright yellow in the first cycle. At the 40<sup>th</sup> cycle, the color turned weak. With the cycle further to 80<sup>th</sup>, the electrochromic process almost disappear. After that, the color keeps black.
